# Supplementary material for: Latent Tuberculosis Infection Diagnosis among Household Contacts in a High Tuberculosis-Burden Area: a Comparison between Transcript Signature and Interferon Gamma Release Assay
Source: PubMed Central journal article supplement (PMC9045189; doi:10.1128/spectrum.02445-21), 2022-04-13
Supplement: spectrum.02445-21-s001.pdf [file spectrum.02445-21-s001.pdf]

1 **Supplementary file**

2

3 **Latent Tuberculosis Infection (LTBI) diagnosis among household contacts (HHCs) in a**

4 **high tuberculosis-burden area: A comparison between transcript signature and**

5 **Interferon Gamma Release Assay (IGRA)**

6 Sheetal Kaul, Vivek Nair, Shweta Birla, Shikha Dhawan, Sumit Rathore, Vishal Khanna,

7 Sheelu Lohiya, Shakir Ali, Shamim Mannan, Kirankumar Rade, Pawan Malhotra, Dinesh

8 Gupta, Ashwani Khanna, Asif Mohammed

9

| <b><u>List of tables</u></b>                                                                                          |
|-----------------------------------------------------------------------------------------------------------------------|
| <b><u>Supplementary Table S1.</u></b> qRT-PCR genes and primer sequences                                              |
| <b><u>Supplementary Table S2.</u></b> Statistical significance for age and gender                                     |
| <b><u>Supplementary Table S3.</u></b> ROC statistics of expression patterns of different gene combinations            |
| <b><u>Supplementary Table S4.</u></b> ROC statistics of expression patterns of FCGR1B, GBP1 and GBP5 gene combination |

10

| <b><u>List of figures</u></b>                                                               |
|---------------------------------------------------------------------------------------------|
| <b><u>Supplementary Figure S1.</u></b> ROC graphs of different gene combinations            |
| <b><u>Supplementary Figure S2.</u></b> ROC graphs of FCGR1B, GBP1 and GBP5 gene combination |

11

12

| S. no. | Gene      | Primer  | Sequence (5'-3')        | Amplicon Size |
|--------|-----------|---------|-------------------------|---------------|
| 1      | TNFRSF10C | Forward | TTCCTGCACCATGACCAGAG    | 122           |
|        |           | Reverse | TACTGACTTGGACTTCCCCAC   |               |
| 2      | ASUN      | Forward | GCACGTCCTTAGCAGTTCTC    | 188           |
|        |           | Reverse | TTGCTCGTTCCAAAGGGACC    |               |
| 3      | NEMF      | Forward | GCTTGCTAGGAATGAGAGTAAAC | 196           |
|        |           | Reverse | CGACTCTTCAAATGTTTTTCGGC |               |
| 4      | FCGR1B    | Forward | GGAAGGGGTGCACCGGAAGG    | 98            |
|        |           | Reverse | CACGGGGAGCAAGTGGGCAG    |               |
| 5      | GBP5      | Forward | TGGCAAATCCTACCTGATGA    | 97            |
|        |           | Reverse | CCATATCCAAATCCCTTGG     |               |
| 6      | GBP1      | Forward | TGCAGGAAATGCAAAGAAAG    | 109           |
|        |           | Reverse | AACTGGACCCTGTCGTTCTC    |               |
| 7      | GAPDH     | Forward | CAACAGCGACACCCACTCCT    | 115           |
|        |           | Reverse | CACCCTGTTGCTGTAGCCAAA   |               |
|        |           | Reverse | GCTGATCCACATCTGCTGGAA   |               |

13 **Table S1. List of genes and sequences of primers used in quantitative RT-PCR**

|                                   | IGRA +ve (43)        | IGRA -ve (37)        |
|-----------------------------------|----------------------|----------------------|
| Age (Mean)                        | 31.88 ( $\pm$ 11.10) | 31.86 ( $\pm$ 13.28) |
| p value for age between groups    | $p=0.995$            |                      |
| Female: Male                      | 21:22                | 17:20                |
| p value for gender between groups | $p=0.796$            |                      |

14 **Table S2. Statistical significance for age and gender between IGRA +ve (Latent infection)**  
15 **and IGRA-ve (Uninfected) cohorts**

16

| Combination                     | AUC       | Lower Limit | Upper Limit | z        | p-value     |
|---------------------------------|-----------|-------------|-------------|----------|-------------|
| <i>FCGR1B, GBP1, GBP5</i>       | 0.6803752 | 0.5570187   | 0.8037316   | 2.865913 | 0.00415809  |
| <i>GBP1, GBP5</i>               | 0.6645022 | 0.5400303   | 0.788974    | 2.590291 | 0.009589485 |
| <i>NEMF, GBP1, GBP5, FCGR1B</i> | 0.6796537 | 0.5564651   | 0.8028423   | 2.858338 | 0.004258658 |
| <i>GBP1, FCGR1B</i>             | 0.6567460 | 0.5333535   | 0.7801385   | 2.489751 | 0.01278327  |

18 **Table S3. ROC statistics of expression patterns of different gene combinations to**  
 19 **assess their potential to discriminate LTBI and uninfected cohorts**

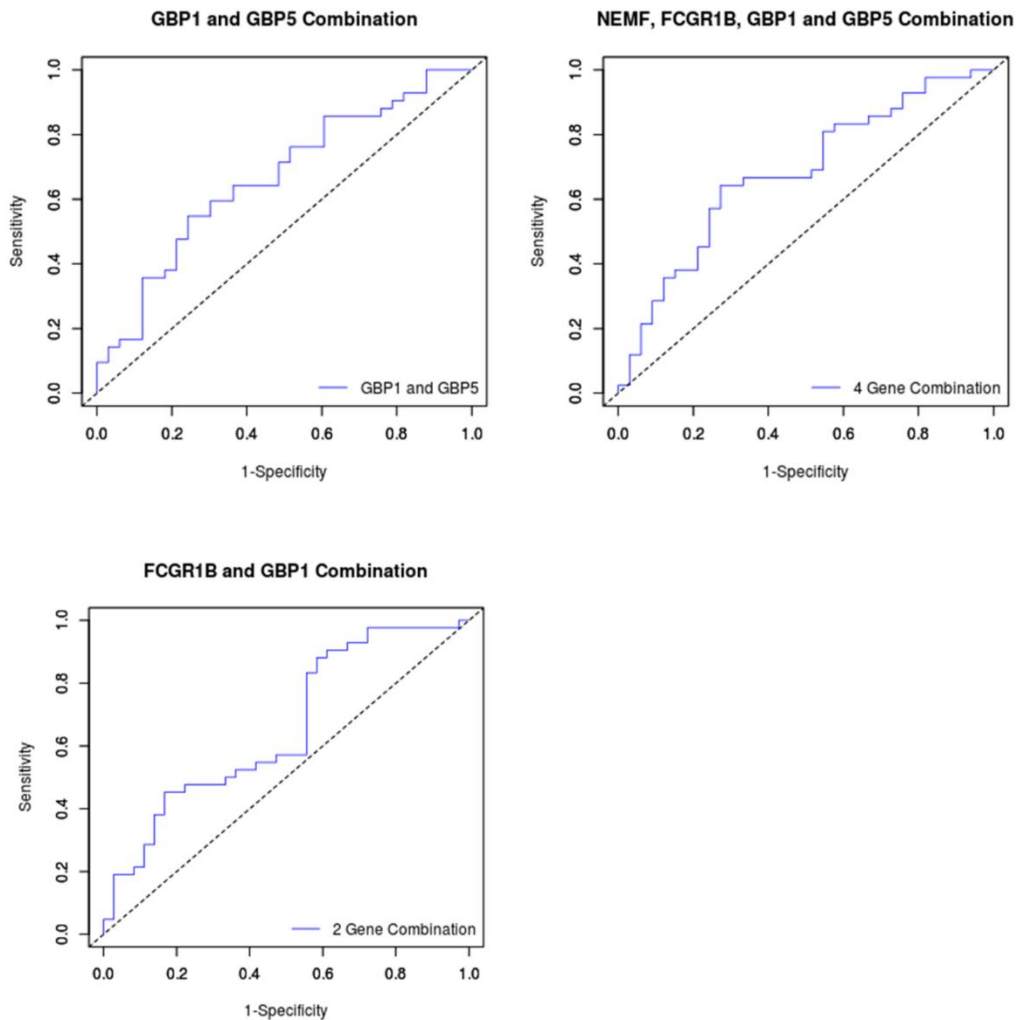

20

21

22 **Figure S1. ROC analysis of expression patterns of different gene combinations to assess**  
 23 **their potential to discriminate LTBI and uninfected cohorts.**

24

25

| <b>FCGR1B, GBP1 and GBP5 Combination</b> | <b>AUC</b> | <b>Lower Limit</b> | <b>Upper Limit</b> | <b>z</b> | <b>p-value</b> |
|------------------------------------------|------------|--------------------|--------------------|----------|----------------|
| <i>Males</i>                             | 0.6666667  | 0.4959048          | 0.8374285          | 1.912961 | 0.05575308     |
| <i>Females</i>                           | 0.6966667  | 0.5171599          | 0.8761734          | 2.147326 | 0.03176733     |

26 **Table S4. ROC statistics of expression patterns of FCGR1B, GBP1 and GBP5 gene**  
27 **combination in males and females to assess their potential to discriminate LTBI**  
28 **and uninfected cohorts.**

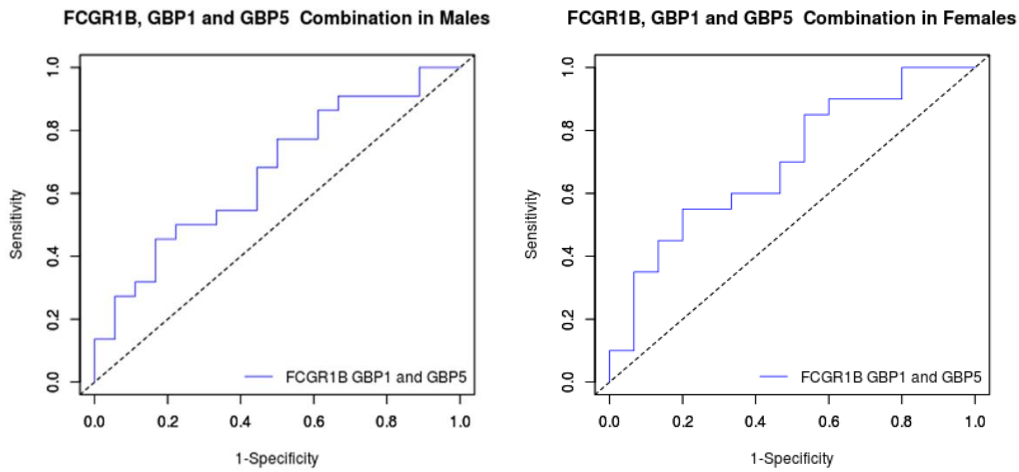

29

30 **Figure S2. ROC analysis of expression patterns of FCGR1B, GBP1 and GBP5 gene**  
31 **combination in males and females to assess their potential to discriminate LTBI**  
32 **and uninfected cohorts.**

33

34

35
